# Supplementary material
Source: PubMed Central journal article supplement (PMC3549106)
Supplement: 1208134110_pnas.201208134SI.pdf [file 1208134110_pnas.201208134SI.pdf]

# Supporting Information

Conrady et al. 10.1073/pnas.1208134110

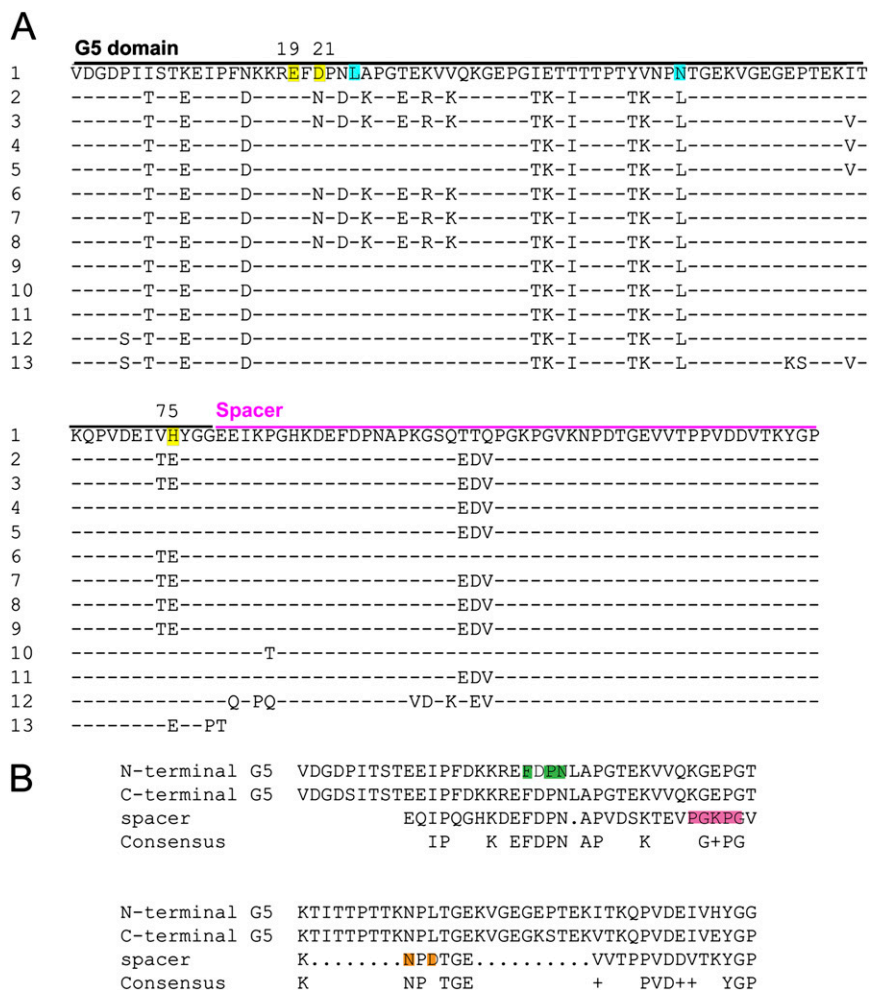

**Fig. S1.** Alignments of Aap Brpt. (A) A sequence alignment of all 13 copies of the B-repeat found in Aap from *Staphylococcus epidermidis* RP62A (GenBank accession no. SERP2398), with the G5 domain indicated by the black line and the spacer motif by the purple line. Residues that are identical to repeat 1 are indicated by a hyphen (-). Zn<sup>2+</sup>-coordinating residues are highlighted in yellow. Met mutagenesis sites are highlighted in cyan. (B) Alignment of the spacer and G5 domains. The alignment of the N- and C-terminal G5 domains with the spacer motif shows regions of high identity separated by sequence gaps indicated by a dot. The PGXPG motif is highlighted in magenta. Note the conservation of residues that contribute to the polar-hydrophobic stack (highlighted in green and orange).

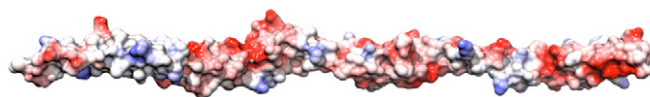

**Fig. S2.** Hydrophilicity of Brpt1.5. Brpt1.5 is shown colored by charge in surface representation. Electropositive patches are in blue, and electronegative patches are shown in red. To generate this figure the missing side chains were modeled in Coot using the most common rotamer. The orientation of the molecule is identical to that of the upper panel in Fig. 1C. The surface is colored according to the Coulombic surface-charge distribution calculated in Chimera (1) [color range of  $\pm 10$  kcal/(mol·e)].

1. Pettersen EF, et al. (2004) UCSF Chimera—a visualization system for exploratory research and analysis. *J Comput Chem* 25(13):1605–1612.



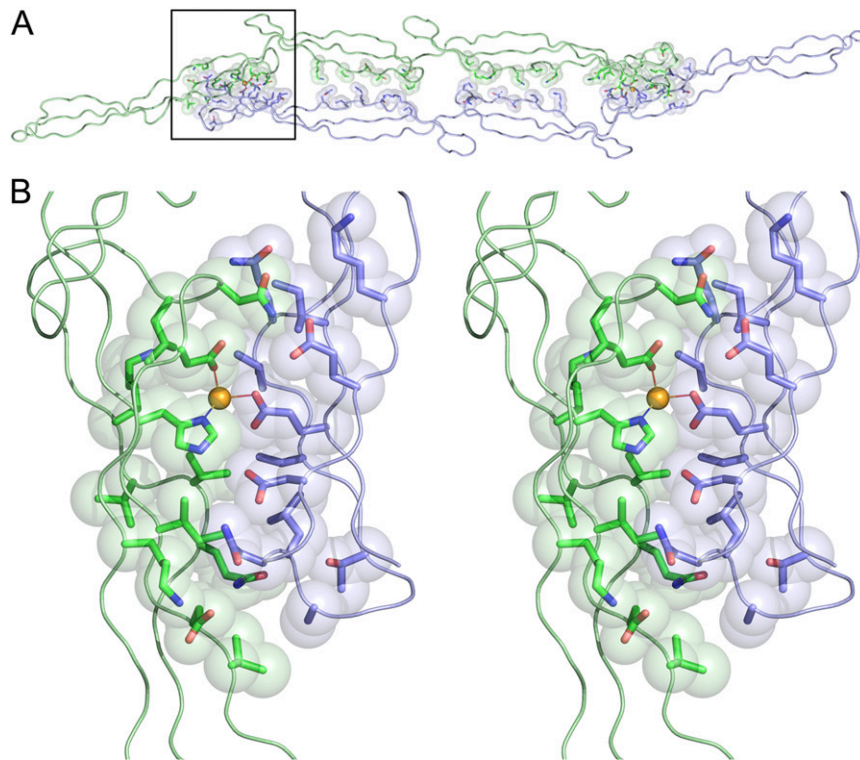

**Fig. S5.** Dimer interface in the vicinity of the Zn<sup>2+</sup>-binding site. (A) Overview of the Native 1 dimer, in which residues contributing to the dimer interface as defined by the PISA server ([www.ebi.ac.uk/msd-srv/prot\\_int/pistart.html](http://www.ebi.ac.uk/msd-srv/prot_int/pistart.html)) are shown as sticks with transparent spheres. (B) Stereo image of the dimer interface in the vicinity of the Zn<sup>2+</sup>-binding site (a rotated view of the boxed region in A). Zn<sup>2+</sup> is shown as a gold sphere with lines to illustrate the ligating residues. For clarity, the Zn<sup>2+</sup> ion is shown with a half-scale radius. The thiocyanate molecule is not visible in this orientation.

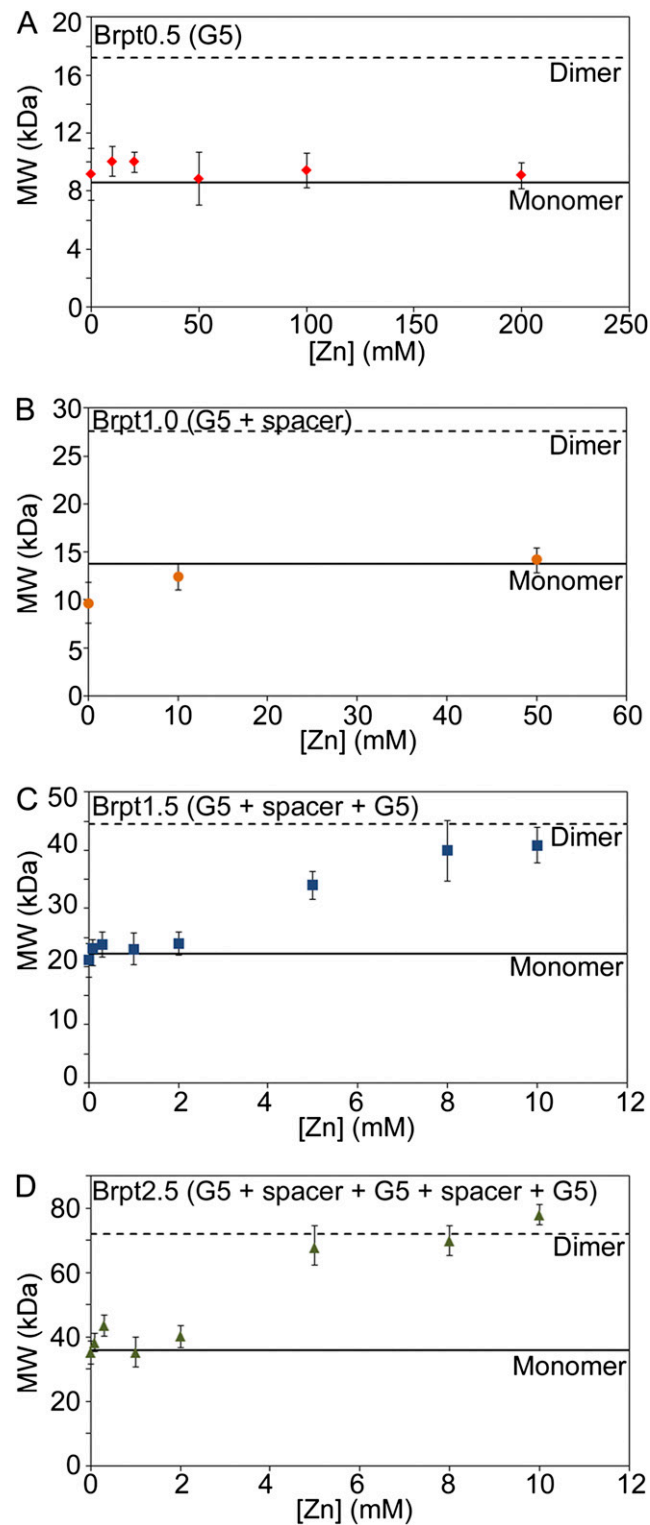

**Fig. S6.** Zn<sup>2+</sup>-dependent dimerization of Brpt1.5 constructs. Constructs were investigated using single-speed sedimentation equilibrium experiments in the presence of varying concentrations of Zn<sup>2+</sup>. Horizontal lines are used to indicate the monomer (solid line) and dimer (dashed line) molecular weights predicted based on the sequences. (A) Brpt0.5 (red diamonds) sediments as a monomer in the presence of up to 200 mM Zn<sup>2+</sup>. (B) Brpt1.0 (orange circles) sediments as a monomer in the presence of up to 50 mM Zn<sup>2+</sup>. (C) Brpt1.5 (blue squares) sediments as dimer in the presence of 8–10 mM Zn<sup>2+</sup>. (D) Brpt2.5 (green triangles) sediments as dimer in the presence of 5–10 mM Zn<sup>2+</sup>.

1. Corrigan RM, Rigby D, Handley P, Foster TJ (2007) The role of *Staphylococcus aureus* surface protein SasG in adherence and biofilm formation. *Microbiology* 153(Pt 8):2435–2446.

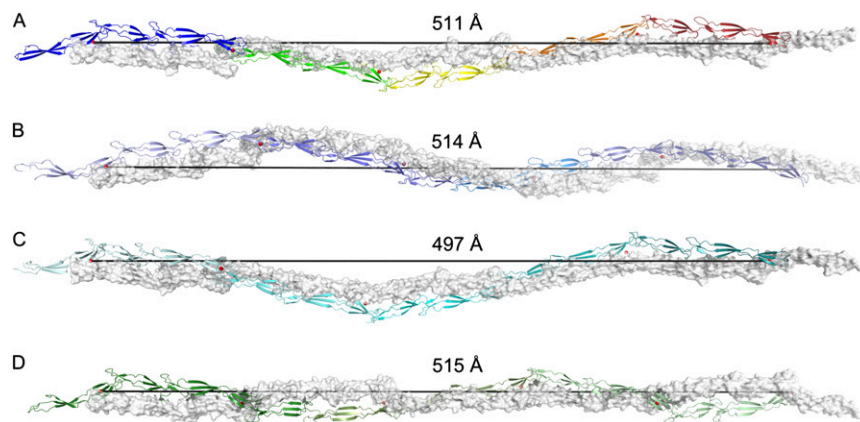

**Fig. S7.** Models of B-repeat dimers that are 5.5 repeats in length. The appearance of a dimer of minimal biologically active repeat length of five repeats (1) is extrapolated based on sequential structural alignments of N- and C-terminal G5 domains. We observe a twisting cable-type structure in which the subunits donated by one monomer wrap around the antiparallel binding partner. These models are based on the distinct dimers observed in the individual data sets. One putative monomer is shown in white surface representation for all data; the other is shown in cartoon representation. (A) The SeMet mutant is shown as a rainbow from blue at the N terminus to red at the C terminus. (B) Chain A from the non-Se-labeled mutant structure is shown as a gradient from light blue at the N terminus to dark blue at the C terminus. (C) Chain B from the non-Se-labeled mutant is shown colored from light to dark cyan. (D) The Native2 protein is shown as a gradient from dark green at the N terminus to light green at the C terminus. The lines shown are measured from the first  $\text{Zn}^{2+}$ -binding site to the last. Note that the SeMet mutant (in A) and chain B from the non-Se mutant (in C) share the same  $\text{Zn}^{2+}$  coordinating residues in the respective crystal structures but differ in predicted 5.5-repeat fibril length.

**Table S1. Data collection and refinement statistics**

| Brpt1.5 construct                                       | SeMet mutant*                                  | Mutant <sup>†</sup>                             | Native 1                                       | Native2                                         |
|---------------------------------------------------------|------------------------------------------------|-------------------------------------------------|------------------------------------------------|-------------------------------------------------|
| <b>Data collection</b>                                  |                                                |                                                 |                                                |                                                 |
| APS Beamline                                            | 24-IDE                                         | 24-IDE                                          | 24-IDC                                         | 24-IDE                                          |
| Wavelength (Å)                                          | 0.9792                                         | 0.9792                                          | 1.2822                                         | 0.9792                                          |
| Space group                                             | C2                                             | C2                                              | C2                                             | C2                                              |
| Unit cell dimensions (Å, °)                             | a, b, c, $\beta$ = 89.72, 33.64, 81.33, 121.06 | a, b, c, $\beta$ = 83.10, 34.24, 138.78, 101.31 | a, b, c, $\beta$ = 92.03, 33.56, 83.15, 122.47 | a, b, c, $\beta$ = 121.11, 34.62, 49.37, 103.11 |
| Resolution (Å) <sup>‡</sup>                             | 44.8–2.4 (2.49–2.4)                            | 50–2.5 (2.59–2.5)                               | 46–2.31 (2.58–2.31)                            | 26–1.97 (2.03–1.97)                             |
| Observations                                            | 212,473                                        | 165,754                                         | 159,727                                        | 172,550                                         |
| Unique reflections                                      | 8,282                                          | 13,488                                          | 9,395                                          | 13,864                                          |
| Completeness (%)                                        | 99.3 (98.9)                                    | 99.4 (99.7)                                     | 97.6 (96.0)                                    | 95.6 (75.9)                                     |
| Redundancy                                              | 5.7 (5.0)                                      | 3.6 (3.7)                                       | 7.3 (6.9)                                      | 5.2 (4.1)                                       |
| R <sub>sym</sub> (%)                                    | 11.1 (38.7)                                    | 7.8 (20.0)                                      | 10.2 (27.5)                                    | 8.3 (53.7)                                      |
| I/ $\sigma$ I                                           | 17.3 (3.7)                                     | 37.7 (13.8)                                     | 26.3 (7.4)                                     | 18.5 (3.0)                                      |
| <b>SAD phasing</b>                                      |                                                |                                                 |                                                |                                                 |
| No. of heavy atom sites                                 | 4                                              | N/A                                             | N/A                                            | N/A                                             |
| Mean figure of merit <sup>§</sup>                       | 0.36/0.75                                      | N/A                                             | N/A                                            | N/A                                             |
| <b>Refinement</b>                                       |                                                |                                                 |                                                |                                                 |
| R <sub>work</sub> /R <sub>free</sub> (%)                | 19.8/25.5                                      | 21.9/27.6                                       | 20.3/25.8                                      | 20.7/25.7                                       |
| Atoms (protein/water/<br>Thiocyanate/Zn <sup>2+</sup> ) | 1480/63/3/1                                    | 2823/108/0/2                                    | 1484/78/3/1                                    | 1437/132/3/1                                    |
| rmsd bonds (Å)                                          | 0.009                                          | 0.01                                            | 0.01                                           | 0.01                                            |
| rmsd angles (°)                                         | 1.20                                           | 1.33                                            | 1.24                                           | 1.20                                            |
| <b>Mean B factors (Å<sup>2</sup>)</b>                   |                                                |                                                 |                                                |                                                 |
| Protein                                                 | 64.73                                          | 31.25 (A)/34.09 (B)                             | 48.24                                          | 46.51                                           |
| Water                                                   | 55.66                                          | 29.86                                           | 47.51                                          | 41.01                                           |
| Thiocyanate                                             | 74.9                                           | N/A                                             | 46.5                                           | 31.82                                           |
| Zn <sup>2+</sup>                                        | 45.47                                          | 39.08                                           | 49.2                                           | 23.09                                           |
| <b>Ramachandran distribution<sup>¶</sup></b>            |                                                |                                                 |                                                |                                                 |
| Favored (%)                                             | 99.5                                           | 99.5                                            | 99.5                                           | 99.5                                            |
| Outliers (%)                                            | 0                                              | 0                                               | 0                                              | 0                                               |
| Molprobability score/percentile <sup>  </sup>           | 1.44/99th                                      | 1.58/99th                                       | 1.14/100th                                     | 1.27/99th                                       |
| Molprobability residues with bad<br>bonds/angles (%)    | 0/0                                            | 0/0                                             | 0/0                                            | 0/0                                             |

SAD, single-wavelength anomalous dispersion.

\*SeMet-labeled Brpt1.5-L24M/L51M/L152M/L179M "quadruple mutant."

<sup>†</sup>Non-Se-labeled Brpt1.5-L24M/L51M/L152M/L179M "quadruple mutant."

<sup>‡</sup>Numbers in parentheses are for highest resolution shell.

<sup>§</sup>Figure of merit from phenix AutoSol before/after density modification.

<sup>¶</sup>As calculated by Molprobability.

<sup>||</sup>The 100th percentile is the best among structures solved at comparable resolution; the 0 percentile is the worst.



**Table S2. Buried side chains in  $\beta$ -rich proteins**

| PDB ID code                                        | Description                                                | Length* | $\beta$ -sheet content <sup>†</sup> (%) | Residues buried <sup>‡</sup> (%) |
|----------------------------------------------------|------------------------------------------------------------|---------|-----------------------------------------|----------------------------------|
| <b>Eukaryotic <math>\beta</math>-rich proteins</b> |                                                            |         |                                         |                                  |
| 1GFL                                               | GFP, <i>Aequorea victoria</i>                              | 230     | 55                                      | 33.5                             |
| 3AYA                                               | Human Galectin-3 CRD                                       | 135     | 66                                      | 27.4                             |
| 3TWY                                               | Rat PKC C2 domain                                          | 137     | 57                                      | 24.8                             |
| 3TZS                                               | Human lipocalin NGAL                                       | 174     | 51                                      | 23.0                             |
| 1BAS                                               | Human basic FGF                                            | 125     | 52                                      | 21.6                             |
| 3L5I                                               | Human GP130, FnIII domains                                 | 290     | 65                                      | 20.7                             |
| 2XYS                                               | Acetylcholine-binding protein, <i>Apysia californica</i>   | 205     | 59                                      | 20.5                             |
| 3K5R                                               | Mouse T-cadherin EC1-2 domains                             | 218     | 55                                      | 20.2                             |
| 1HZH-L                                             | Human b12 IgG1, kappa light chain                          | 214     | 64                                      | 19.6                             |
| 3RB5                                               | <i>Drosophila</i> CALX Na/Ca exchanger, CBD1-2 domains     | 238     | 64                                      | 19.3                             |
| 1FNF                                               | Human Fibronectin, repeats 7–10                            | 368     | 69                                      | 17.4                             |
| 2GI7                                               | Human GPVI, Ig-like domains                                | 182     | 69                                      | 17.0                             |
| 1HZH-H                                             | Human b12 IgG1, heavy chain                                | 443     | 58                                      | 15.8                             |
| <i>Average</i>                                     |                                                            | 228     | 60                                      | 22                               |
| <b>Bacterial cell-surface proteins</b>             |                                                            |         |                                         |                                  |
| 2ODL                                               | HMW1 secretion domain, <i>Haemophilus influenzae</i>       | 372     | 74                                      | 37.1                             |
| 1OIO                                               | GAFD (F17C-type) fimbrial adhesin, <i>Escherichia coli</i> | 178     | 71                                      | 26.4                             |
| 1R17                                               | SdrG adhesin, <i>S. epidermidis</i>                        | 321     | 58                                      | 24.3                             |
| 1PDK                                               | PapD pilus chaperone, <i>E. coli</i>                       | 215     | 60                                      | 20.9                             |
| 3B2M                                               | Major pilin, <i>Streptococcus pyogenes</i>                 | 294     | 63                                      | 20.1                             |
| 1D2O                                               | CNA collagen-binding domain, <i>S. aureus</i>              | 187     | 60                                      | 18.2                             |
| 2AXW                                               | DRAD invasin (Ig-like domains), <i>E. coli</i>             | 134     | 59                                      | 14.2                             |
| 2VYU                                               | Choline-binding protein, <i>Streptococcus pneumoniae</i>   | 300     | 50                                      | 14.0                             |
| <i>Average</i>                                     |                                                            | 250     | 62                                      | 22                               |
| Aap Brpt1.5, <i>S. epidermidis</i>                 |                                                            | 206     | 83                                      | 3.9                              |

Proteins at least 125 residues in length with  $\geq 50\%$   $\beta$ -sheet content and known structure were analyzed for side-chain exposure. All structures analyzed reported a resolution of 2.5 Å or greater (except for 1HZH at 2.7 Å, which is the highest-resolution intact antibody structure available). When multiple chains are found in the PDB model, chain A was used except where noted (i.e., 1HZH).

\*Number of amino acids in the PDB file.

<sup>†</sup>Percent of residues in  $\beta$ -sheets.

<sup>‡</sup>Percent of residues at least 95% buried, as calculated by the VADAR server (1) (<http://vadar.wishartlab.com/>).

**Table S3. Primers used for site-directed mutagenesis**

| Mutation                              | 5' Primer (first listed sequence per mutation)<br>3' Primer (second listed sequence per mutation)         |
|---------------------------------------|-----------------------------------------------------------------------------------------------------------|
| <b>Methionine</b>                     |                                                                                                           |
| L24M                                  | 5'-CGAATTTGATCCAAACATGGGCCAGGTACAGAGAAAGTCG-3'<br>5'-CGACTTTCTCTGTACCTGGCGCCATGTTGGATCAAATTCG-3'          |
| L51M                                  | 5'-CAACGCCAACAACTAAGAACCCAAATGACAGGAGAAAAAGTTGGC-3'<br>5'-GCCAACTTTTTCTCCTGTCATTGGGTTCTTAGTTGTTGGCGTTG-3' |
| <b>Zn<sup>2+</sup>-binding pocket</b> |                                                                                                           |
| E19A                                  | 5'-GATAAGAAACGTGCATTTGATCCAAACTAGCCCC-3'<br>5'-GGGGCTAAGTTTGGATCAAATGCACGTTTCTTATC-3'                     |
| D21A                                  | 5'-GAAACGTGAATTTGCTCCAACTTAGCCCC-3'<br>5'-GGGGCTAAGTTTGGAGCAAATTCACGTTTC-3'                               |
| H75E                                  | 5'-GTGGATGAGATTGTTGAGTATGGTGGTGAAC-3'<br>5'-GTTACCACCATACTCAACAATCTCATCCAC-3'                             |
| E203A                                 | 5'-GTTGACGAAATTTGTCGTATGGTCCAAC-3'<br>5'-GTTGGACCATACGCAACAATTCGTCAAC-3'                                  |
| <b>Stability</b>                      |                                                                                                           |
| F89A                                  | 5'-CATAAAGATGAAGCTGATCCAAATGC-3'<br>5'-GCATTTGGATCAGCTTCATCTTTATG-3'                                      |
